# Supplementary material for: A new carbon allotrope with high carrier mobility and optical absorption
Source: Royal Society of Chemistry journal article supplement (doi:10.1039/d4cp02685c), 2024-12-11
Supplement: d4cp02685c1.pdf [file d4cp02685c1.pdf]

Supplementary Information (SI) for Physical Chemistry Chemical Physics.  
This journal is © the Owner Societies 2024

## Supplementary Information for

# **A new carbon allotrope with high carrier mobility and optical absorption**

Zhigang Shao,<sup>\*a,b</sup> Guangyu Zhou,<sup>a,b</sup> Canglong Wang,<sup>c,d</sup> and Lei Yang<sup>c,d</sup>

<sup>a</sup> Guangdong Basic Research Center of Excellence for Structure and Fundamental Interactions of Matter, Guangdong Provincial Key Laboratory of Quantum Engineering and Quantum Materials, School of Physics, South China Normal University, Guangzhou, China.

<sup>b</sup> Guangdong-Hong Kong Joint Laboratory of Quantum Matter, Frontier Research Institute for Physics, South China Normal University, Guangzhou, China.

<sup>c</sup> Institute of Modern Physics, Chinese Academy of Sciences, Lanzhou, China.

<sup>d</sup> School of Nuclear Science and Technology, University of Chinese Academy of Sciences, Beijing, China.

\*correspondence to: Tel: +86 136 2283 9126; E-mail: zgshao@scnu.edu.cn

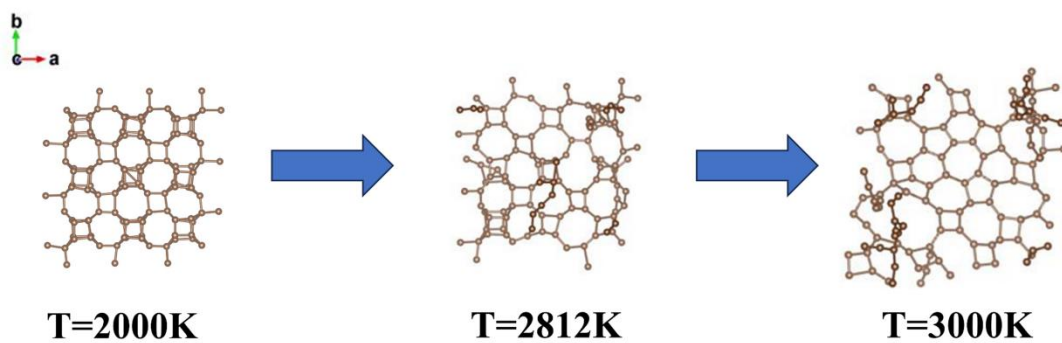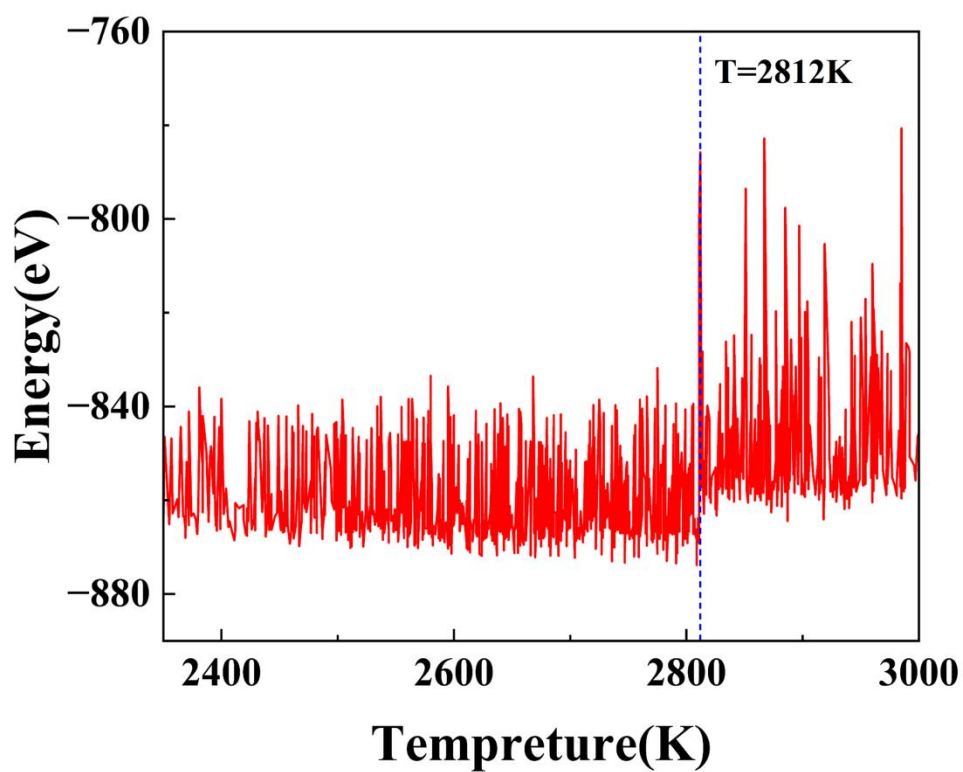

**Fig. S1 Variation of structure and energy with temperature.**
